# Supplementary material
Source: PubMed Central journal article supplement (PMC3085738)
Supplement: emm-43-197-s001.pdf [file emm-43-197-s001.pdf]

## Supplemental Data

**Table S1.** The sequences of primers.

| Target gene | Primers                                                                           | Annealing temperature (°C) |
|-------------|-----------------------------------------------------------------------------------|----------------------------|
| IL-23       | Forward:5'-CCAAAGGAGGTGGATAGG-3'<br>Reverse:5'-GCTGGAGGAGTTGGCTGA-3'              | 58                         |
| IL-17       | Forward:5'-TCTCATCCAGCAAGAGATCC-3'<br>Reverse: 5'-AGTTTGGGACCCCTTACAC-3'          | 58                         |
| GAPDH       | Forward:5'-GGGTGATGCTGGTGCTGAGTATGT-3'<br>Reverse:5'-AAGAATGGGAGTTGCTGTTGAAGTC-3' | 55                         |
